# Supplementary material
Source: PubMed Central journal article supplement (PMC8284441)
Supplement: NIHMS1659067-supplement-1.pdf [file NIHMS1659067-supplement-1.pdf]

## **Online Supplemental Appendix**

### **Accompanying the manuscript:**

#### **Cost-effectiveness of point-of-care testing with task-shifting for HIV care in South Africa: a modelling study**

Monisha Sharma, Edinah Mudimu, Kate Simeon, Anna Bershteyn, Jienchi Dorward, Lauren R Violette, Adam Akullian, Salim S Abdool Karim, Connie Celum, Nigel Garrett, Paul K. Drain

**Table S1. Model parameters.** Select model parameters used to fit the EMOD-HIV transmission model to survey data on prevalence and ART coverage from South Africa. Median and interquartile ranges (IQRs) reported for all dynamic parameters used in the calibration process from 250 best-fitting parameter sets.<sup>†</sup>

| Parameter                                               | Description                                                                                                                                                         | Dynamic | Static value / fitted mean (IQR) | Source |
|---------------------------------------------------------|---------------------------------------------------------------------------------------------------------------------------------------------------------------------|---------|----------------------------------|--------|
| AIDS_Duration_In_Months                                 | The length of time, in months, prior to an AIDS-related death over which the AIDS_Stage_Infectivity_Multiplier is applied                                           | no      | 9                                | (1)    |
| AIDS_Stage_Infectivity_Multiplier                       | Multiplier acting on Base_Infectivity to determine the per-act transmission probability of an individual during AIDS stage                                          | no      | 4.5                              | (1)    |
| ART_CD4_at_Initiation_Saturating_Reduction_in_Mortality | The duration from ART enrollment to on-ART HIV-caused death increases with CD4 at ART initiation up to a threshold determined by this parameter value.              | no      | 350                              |        |
| ART_dropout                                             | Exponentially distributed mean number of days from ART initiation until ART dropout, corresponds to 5% annual dropout.                                              | no      | 7300                             |        |
| ART_Link_Max                                            | The right asymptote for the sigmoid trend of probability of ART linkage (given eligibility) over time.                                                              | yes     | 0.992 (0.987 - 1)                |        |
| ART_Link_Mid                                            | The time of the inflection point in the sigmoid trend of probability of ART linkage (given eligibility) over time.                                                  | yes     | 2005.9 (2005.7 - 2006.2)         |        |
| ART_link_Min                                            | The left asymptote for the sigmoid trend of probability of ART linkage (given eligibility) over time.                                                               | no      | 0                                |        |
| ART_link_Rate                                           | The slope of the inflection point in the sigmoid trend of probability of ART linkage over time. A Rate of 1 sets the slope to a 25% change in probability per year. | no      | 1                                |        |
| Base_Infectivity                                        | The probability of transmission when none of the transmission multipliers apply to a coital act (or when all multipliers are set to 1).                             | yes     | 0.00144 (0.00138 - 0.00155)      | (2)    |
| CD4_At_Death_LogLogistic_Heterogeneity                  | The inverse shape parameter of a Weibull distribution that represents the at-death CD4 cell count.                                                                  | no      | 0.7                              |        |
| CD4_At_Death_LogLogistic_Scale                          | The scale parameter of a Weibull distribution that represents the at-death CD4 cell count.                                                                          | no      | 2.96                             |        |
| CD4_Post_Infection_Weibull_Heterogeneity                | The inverse shape parameter of a Weibull distribution that represents the post-acute-infection CD4 cell count.                                                      | no      | 0.2756                           |        |

|                                                          |                                                                                                                                                                   |    |             |       |
|----------------------------------------------------------|-------------------------------------------------------------------------------------------------------------------------------------------------------------------|----|-------------|-------|
| CD4_Post_Infection_Weibull_Scale                         | The scale parameter of a Weibull distribution that represents the post-acute-infection CD4 cell count.                                                            | no | 560.43      |       |
| Circumcision_Reduced_Acquire                             | The reduction of susceptibility to HIV by voluntary male medical circumcision (VMMC)                                                                              | no | 0.6         | (3-5) |
| Coital_Act_Rate                                          | Number of coital acts per day for all relationships except commercial ones                                                                                        | no | 0.33        |       |
| Coital_Act_Rate_Commercial                               | Number of coital acts per day for commercial relationships                                                                                                        | no | 0.002739726 |       |
| Coital_Dilution_Factor_2_Partners                        | The multiplicative reduction in the coital act rate for all relationship types when an individual has exactly two current partners. Represents coital dilution.   | no | 0.75        |       |
| Coital_Dilution_Factor_3_Partners                        | The multiplicative reduction in the coital act rate for all relationship types when an individual has exactly three current partners. Represents coital dilution. | no | 0.6         |       |
| Coital_Dilution_Factor_4_Plus_Partners                   | The multiplicative reduction in the coital act rate for all relationship types when an individual has exactly three current partners. Represents coital dilution. | no | 0.45        |       |
|                                                          | The maximum asymptote for commercial relationships                                                                                                                | no | 0.85        |       |
| Commercial_Condom_Mid                                    | The year of the inflection point for commercial relationships                                                                                                     | no | 1999.5      |       |
| Commercial_Condom_Min                                    | The minimum asymptote of the probability of condom use per coital act for informal relationships for commercial relationships                                     | no | 0.5         |       |
| Commercial_Condom_Rate                                   | The rate proportional to the slope at the inflection point for commercial relationships                                                                           | no | 1           |       |
| Commercial_Form_Rate                                     | Exponentially distributed mean number new relationships formed per day for commercial relationships                                                               | no | 0.15        |       |
| Condom_Transmission_Blocking_Probability                 | The per-act multiplier of the transmission probability when a condom is used                                                                                      | no | 0.8         |       |
| Days_Between_Symptomatic_And_Death_Weibull_Heterogeneity | The time between the onset of AIDS symptoms and death is sampled from a Weibull distribution; this                                                                | no | 0.5         |       |

parameter governs the heterogeneity (inverse shape) of the Weibull.

|                                                  |                                                                                                                                                                                                                                                                                                                                                                                                                                                                                                                                                                                                                                          |    |         |
|--------------------------------------------------|------------------------------------------------------------------------------------------------------------------------------------------------------------------------------------------------------------------------------------------------------------------------------------------------------------------------------------------------------------------------------------------------------------------------------------------------------------------------------------------------------------------------------------------------------------------------------------------------------------------------------------------|----|---------|
| Days_Between_Symptomatic_And_Death_Weibull_Scale | The time between the onset of AIDS symptoms and death is sampled from a Weibull distribution; this parameter governs the scale of the Weibull.                                                                                                                                                                                                                                                                                                                                                                                                                                                                                           | no | 618.34  |
| Delay_Period_Mean                                | Delay from HIV infection until ART initiation for future ART scale-up scenarios, post 2016 (in days).                                                                                                                                                                                                                                                                                                                                                                                                                                                                                                                                    | no | 180     |
| HIV_Adult_Survival_Scale_Parameter_Intercept     | Determines the intercept of the scale parameter for the Weibull distribution used to determine HIV survival time. Survival time with untreated HIV infection depends on the age of the individual at the time of infection, and is drawn from a Weibull distribution with shape parameter (see HIV_Adult_Survival_Shape_Parameter) and scale parameter. The scale parameter is allowed to vary linearly with age as follows<br>$\lambda = \text{HIV\_Adult\_Survival\_Scale\_Parameter\_Intercept} + \text{HIV\_Adult\_Survival\_Scale\_Parameter\_Slope} * \text{Age (in years)}$                                                       | no | 21.182  |
| HIV_Adult_Survival_Scale_Parameter_Slope         | This parameter determines the slope of the scale parameter for the Weibull distribution used to determine HIV survival time.                                                                                                                                                                                                                                                                                                                                                                                                                                                                                                             | no | -0.2717 |
| HIV_Adult_Survival_Shape_Parameter               | This parameter determines the shape of the Weibull distribution used to determine age-dependent survival time for individuals infected with HIV.                                                                                                                                                                                                                                                                                                                                                                                                                                                                                         | no | 2       |
| HIV_Age_Max_for_Adult_Age_Dependent_Survival     | Survival time with untreated HIV infection depends on the age of the individual at the time of infection, and is drawn from a Weibull distribution with shape parameter and scale parameters<br>(See HIV_Adult_Survival_Scale_Parameter_Intercept, HIV_Adult_Survival_Scale_Parameter_Slope, and HIV_Adult_Survival_Shape_Parameter).<br>Although the scale parameter for survival time declines with age, it cannot become negative. To avoid negative survival times at older ages, this parameter, HIV_Age_Max_for_Adult_Age_Dependent_Survival, determines the age beyond which HIV survival is no longer affected by further aging. | no | 50      |
| HIV_Age_Max_for_Child_Survival_Function          | The maximum age at which an individual's survival will be fit to the child survival function. If the value of                                                                                                                                                                                                                                                                                                                                                                                                                                                                                                                            | no | 15      |

this parameter falls between zero and the age of sexual debut, model results are not sensitive to this parameter as there is no mechanism for children to become infected between infancy and sexual debut.

|                                                      |                                                                                                                           |     |                             |
|------------------------------------------------------|---------------------------------------------------------------------------------------------------------------------------|-----|-----------------------------|
| HIV_Child_Survival_Rapid_Progressor_Fraction         | The proportion of HIV-infected children who are rapid HIV progressors.                                                    | no  | 0.57                        |
| HIV_Child_Survival_Rapid_Progressor_Rate             | The exponential decay rate, in years, describing the distribution of HIV survival for children who are rapid progressors. | no  | 1.52                        |
| HIV_Child_Survival_Slow_Progressor_Scale             | The Weibull scale parameter describing the distribution of HIV survival for children who are slower progressors.          | no  | 16                          |
| HIV_Child_Survival_Slow_Progressor_Shape             | The Weibull shape parameter describing the distribution of HIV survival for children who are slower progressors.          | no  | 2.7                         |
| Informal_Condom_Max                                  | The maximum asymptote for informal relationships                                                                          | yes | 0.355 (0.328 - 0.38)        |
| Informal_Condom_Mid                                  | The year of the inflection point for informal relationships                                                               | yes | 1999.1 (1997.9 - 2000.2)    |
| Informal_Condom_Min                                  | The minimum asymptote of the probability of condom use per coital act for informal relationships                          | no  | 0                           |
| Informal_Condom_Rate                                 | The rate proportional to the slope at the inflection point for informal relationships                                     | yes | 1.947 (1.788 - 2.099)       |
| Informal_Form_Rate                                   | Exponentially distributed mean number new relationships formed per day for informal relationships                         | yes | 0.00096 (0.00083 - 0.00105) |
| Male_To_Female_Relative_Infectivity_Multiplier_Old   | An array of scale factors governing the susceptibility of females relative to males, by age $\geq 25$                     | yes | 2.311 (2.187 - 2.43)        |
| Male_To_Female_Relative_Infectivity_Multiplier_Young | An array of scale factors governing the susceptibility of females relative to males, by age $< 25$                        | yes | 3.755 (2.803 - 4.463)       |
| Marital_Condom_Max                                   | The maximum asymptote for marital relationships                                                                           | yes | 0.213 (0.187 - 0.24)        |

|                                               |                                                                                                                                                                        |     |                              |
|-----------------------------------------------|------------------------------------------------------------------------------------------------------------------------------------------------------------------------|-----|------------------------------|
| Marital_Condom_Mid                            | The year of the inflection point for marital relationships                                                                                                             | yes | 1995.0 (1994.3 - 1995.7)     |
| Marital_Condom_Min                            | The minimum asymptote of the probability of condom use per coital act for informal relationships for marital relationships                                             | no  | 0                            |
| Marital_Condom_Rate                           | The rate proportional to the slope at the inflection point for marital relationships                                                                                   | yes | 3.528 (3.465 - 3.675)        |
| Marital_Form_Rate                             | Exponentially distributed mean number new relationships formed per day for marital relationships                                                                       | yes | 0.0001 (0.000095 - 0.000111) |
| Maternal_Infection_Transmission_Probability   | The probability of transmission of infection from mother to infant at birth.                                                                                           |     | 0.3                          |
| Maternal_Transmission_ART_Multiplier          | The maternal transmission multiplier for on-ART mothers.                                                                                                               | no  | 0.03334                      |
| preART_Link_Max                               | The right asymptote for the sigmoid trend of probability of preART linkage (given eligibility) over time.                                                              | yes | 0.870 (0.828 - 0.937)        |
| preART_Link_Mid                               | The time of the inflection point in the sigmoid trend of probability of preART linkage (given eligibility) over time.                                                  | yes | 1999.1 (1998 - 2000.1)       |
| preART_link_Min                               | The left asymptote for the sigmoid trend of probability of preART linkage (given eligibility) over time.                                                               | yes | 0.621 (0.6 - 0.653)          |
| preART_link_Rate                              | The slope of the inflection point in the sigmoid trend of probability of preART linkage over time. A Rate of 1 sets the slope to a 25% change in probability per year. | no  | 1                            |
| Proportion_Low_Risk                           | Proportion of the initial population that is low risk                                                                                                                  | yes | 0.497 (0.446 - 0.546)        |
| Sexual_Debut_Age_Female_Weibull_Heterogeneity | The inverse shape of the Weibull distribution for female debut age.                                                                                                    | yes | 0.052 (0.04 - 0.065)         |
| Sexual_Debut_Age_Female_Weibull_Scale         | The scale term of the Weibull distribution for female debut age.                                                                                                       | yes | 16.401 (16.219 - 16.56)      |
| Sexual_Debut_Age_Male_Weibull_Heterogeneity   | The inverse shape of the Weibull distribution for male debut age.                                                                                                      | yes | 0.037 (0.026 - 0.048)        |
| Sexual_Debut_Age_Male_Weibull_Scale           | The scale term of the Weibull distribution for male debut age.                                                                                                         | yes | 16.623 (16.32 - 16.938)      |
| Sexual_Debut_Age_Min                          | The minimum age at which individuals become eligible to form sexual relationships.                                                                                     | no  | 13                           |
| Transitory_Condom_Max                         | The maximum asymptote for transitory relationships                                                                                                                     | yes | 0.584 (0.555 - 0.624)        |

|                                  |                                                                                                                               |     |                                |
|----------------------------------|-------------------------------------------------------------------------------------------------------------------------------|-----|--------------------------------|
| Transitory_Condom_Mid            | The year of the inflection point for transitory relationships                                                                 | yes | 2007.2 (2006.4 - 2007.8)       |
| Transitory_Condom_Min            | The minimum asymptote of the probability of condom use per coital act for informal relationships for transitory relationships | no  | 0                              |
| Transitory_Condom_Rate           | The rate proportional to the slope at the inflection point for transitory relationships                                       | yes | 1.975 (1.839 - 2.038)          |
| Transitory_Form_Rate             | Exponentially distributed mean number new relationships formed per day for transitory relationships                           | yes | 0.001291 (0.001219 - 0.001386) |
| Transitory_Weibull_Heterogeneity | Inverse of the Weibull shape (1/kappa) parameter of relationship duration in years for transitory relationships               | no  | 0.833333333                    |
| Transitory_Weibull_Scale         | Weibull scale parameter of relationship duration in years for transitory relationships.                                       | no  | 0.956774771                    |

---

†A full description of all parameters and references available is at: <http://idmod.org/docs/hiv/parameter-configuration.html> and elsewhere. (6)

## Cost estimates

In the standard of care scenario, we assumed 3% of patients on ART were on second line treatment and 20% of those on ART were participating in Differentiated Service Delivery (DSD) based on the literature for South Africa.(7, 8) Therefore, ART costs were assumed to be weighted average accounting for individuals on second line treatment as well as those participating in DSD. In the intervention scenario, we assumed that 4% of patients on ART were on second line treatment in the and 45% of patients on ART were participating in DSD for ART pick-up at local pharmacies, based on the results from the STREAM clinical trial. Cost estimates of point-of-care monitoring tests were obtained through a detailed microcosting of the STREAM trial from the payer perspective.(9) We conducted time-and-motion observations of sample collection and processing to estimate staff time costs. Expense reports were utilized to estimate consumables, POC instrument and maintenance costs. Capital costs were annualized assuming 5-years of useful life with 3% discounting.(10) Public laboratory tests were obtained from the South African National Health Laboratory Service (NHLS) price lists and costs of nurse time and consumables were added based on the STREAM microcosting. We assumed enrolled nurses conducted POC testing in the intervention scenario as implemented in the STREAM trial. Enrolled nurses in South Africa complete two years of training (compared to four years for professional nurses) and are trained to perform all aspects of HIV clinical care including point of care testing, clinical assessments, and adherence counseling.(11, 12)

**Table S2. Cost per test for point of care and centralized laboratory costs<sup>¥</sup>**

|                            | Point of Care | Centralized Laboratory |
|----------------------------|---------------|------------------------|
| <b>CD4 Count</b>           |               |                        |
| Clinic Medical Consumables | 0.41          | 0.41                   |
| Lab Consumables            | 0.11          | 4.84                   |
| Cartridge/Test             | 6.62          |                        |
| Lab Staff Costs            | 0.2           |                        |
| Instrument/Supply Costs    | 3.33          |                        |
| Clinic Staff Costs         | 0.44          | 0.78                   |
| <b>Total Per Test</b>      | <b>11.11</b>  | <b>6.03</b>            |
| <b>HIV Viral Load</b>      |               |                        |
| Clinic Medical Consumables | 0.41          | 0.48                   |
| Lab Consumables            | 0.11          | 24.72                  |
| Cartridge/Test             | 18.82         |                        |
| Lab Staff Costs            | 0.33          |                        |
| Instrument/Supply Costs    | 5.28          |                        |
| Clinic Staff Costs         | 0.44          | 0.78                   |
| <b>Total Per Test</b>      | <b>25.39</b>  | <b>25.98</b>           |
| <b>Creatinine</b>          |               |                        |
| Clinic Medical Consumables | 0.22          | 0.42                   |
| Lab Consumables            | 0             | 2.21                   |
| Cartridge/Test             | 8.14          |                        |
| Lab Staff Costs            | 0             |                        |
| Instrument/Supply Costs    | 0.23          |                        |
| Clinic Staff Costs         | 0.22          | 0.78                   |
| <b>Total Per Test</b>      | <b>8.81</b>   | <b>3.41</b>            |

<sup>¥</sup>POC test costs assuming a clinic volume of 50 monthly ART initiations



**Table S3. Utility weights for estimating disability-adjusted life-years averted**

| Health State             | DALY Weight | Reference                           |
|--------------------------|-------------|-------------------------------------|
| HIV-negative             | 0           | Salomon <i>et al.</i> <sup>41</sup> |
| HIV-positive CD4>350     | 0.078       |                                     |
| HIV-positive CD4 200-350 | 0.274       |                                     |
| HIV-positive CD4<200     | 0.582       |                                     |
| HIV-positive on ART      | 0.078       |                                     |
| Dead                     | 1           |                                     |

**Figure S1: Flowchart of WHO monitoring guidelines for patients on ART**

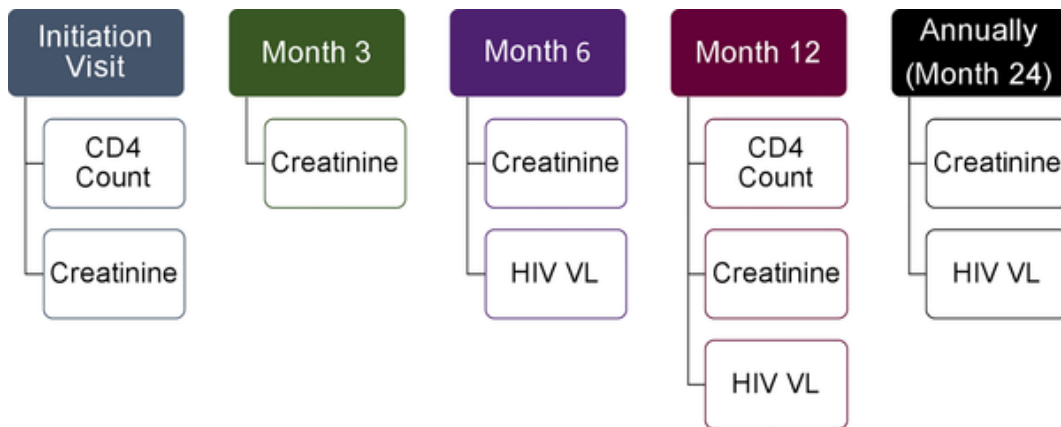

## Impact of viral suppression on excess mortality among HIV-infected adults on ART

In the model, mortality risk among people living with HIV (PLHIV) on antiretroviral therapy (ART) is dependent on viral load (VL), dichotomized into categories of less than or greater than 1,000 viral copies/mL. To model VL-dependent mortality among PLHIV on ART, we assume that the overall distribution of mortality risk is a weighted average of the VL stratum-specific distributions of mortality risk as follows:

$$\frac{k_t}{\lambda_t} \left(\frac{x}{\lambda_t}\right)^{\lambda_t-1} e^{-\left(\frac{x}{\lambda_t}\right)^{k_t}} = p_s * \left(\frac{k_s}{\lambda_s} \left(\frac{x}{\lambda_s}\right)^{k_s-1} e^{-\left(\frac{x}{\lambda_s}\right)^{k_s}}\right) + p_{ns} * HR_{ns} * \left(\frac{k_s}{\lambda_s} \left(\frac{x}{\lambda_s}\right)^{k_s-1} e^{-\left(\frac{x}{\lambda_s}\right)^{k_s}}\right)$$

where  $k_t$  and  $\lambda_t$  are the shape and scale parameters, respectively, of the overall Weibull-distributed mortality risk;  $k_s$  and  $\lambda_s$  are the shape and scale parameters, respectively, of Weibull-distributed mortality risk among individuals on ART with <1,000 viral copies/mL;  $p_s$  and  $p_{ns}$  are the proportion of individuals with less than and greater than 1,000 viral copies/mL, respectively;  $HR_{ns}$  is the hazard ratio of death among individuals on ART with viral load great than 1,000 viral copies/mL relative to those with less than 1,000 viral copies/mL; and  $x$  indicates time since ART initiation.

As described in our previous modeling work, values for  $k_t$  and  $\lambda_t$  are estimated based on observed survival from IeDEA cohorts of individuals initiating ART in 2004-2007 in Côte d'Ivoire, Malawi, and South Africa.(13) The weights applied to the VL strata,  $p_s$  and  $p_{ns}$ , are based on 2012 estimates of percentage of persons virally suppressed on ART in South Africa, 0.754 and 0.246, respectively.(14) Consistent with other models of HIV transmission dynamics,(15) we assume that this proportion increases over time and stabilizes at 83% by 2018, although we vary this assumption in sensitivity analyses. Based on clinical trial data, we assume that individuals on ART with VL greater than 1,000 viral copies/mL experience a 1.96-fold increase in the risk of death at any given time point.(16)

Substituting these values into the corresponding variables, our equation becomes:

$$\frac{0.34}{123.83} \left(\frac{x}{123.83}\right)^{123.83-1} e^{-\left(\frac{x}{123.83}\right)^{0.34}} = 0.754 * \left(\frac{k_s}{\lambda_s} \left(\frac{x}{\lambda_s}\right)^{k_s-1} e^{-\left(\frac{x}{\lambda_s}\right)^{k_s}}\right) + 0.246 * 1.96 * \left(\frac{k_s}{\lambda_s} \left(\frac{x}{\lambda_s}\right)^{k_s-1} e^{-\left(\frac{x}{\lambda_s}\right)^{k_s}}\right)$$

Which is then rearranged as:

$$\frac{\frac{0.34}{123.83} \left(\frac{x}{123.83}\right)^{123.83-1} e^{-\left(\frac{x}{123.83}\right)^{0.34}}}{1.23616} = \frac{k_s}{\lambda_s} \left(\frac{x}{\lambda_s}\right)^{k_s-1} e^{-\left(\frac{x}{\lambda_s}\right)^{k_s}}$$

We assume ranges of possible values for  $\lambda_s$  of [100, 400] and for  $k_s$  of [0.01, 0.50], and identify the combination of  $\lambda_s$  and  $k_s$  parameter values that minimizes the inequality in equation above, as evaluated by the difference in their squared errors. The resulting parameter values that characterize Weibull-distributed mortality risk among PLHIV on ART with viral load less than 1,000 viral copies/mL are  $\lambda_s=302$  and  $k_s$

=0.32. This Weibull distribution is multiplied by 1.96 at all time points to infer the mortality risk among PLHIV on ART with viral load greater than 1,000 viral copies/mL (Figure S2).

**Figure S2.** Weibull distribution of mortality risk among the total population of individuals on ART and stratified by viral load less than/greater than 1,000 viral copies/mL

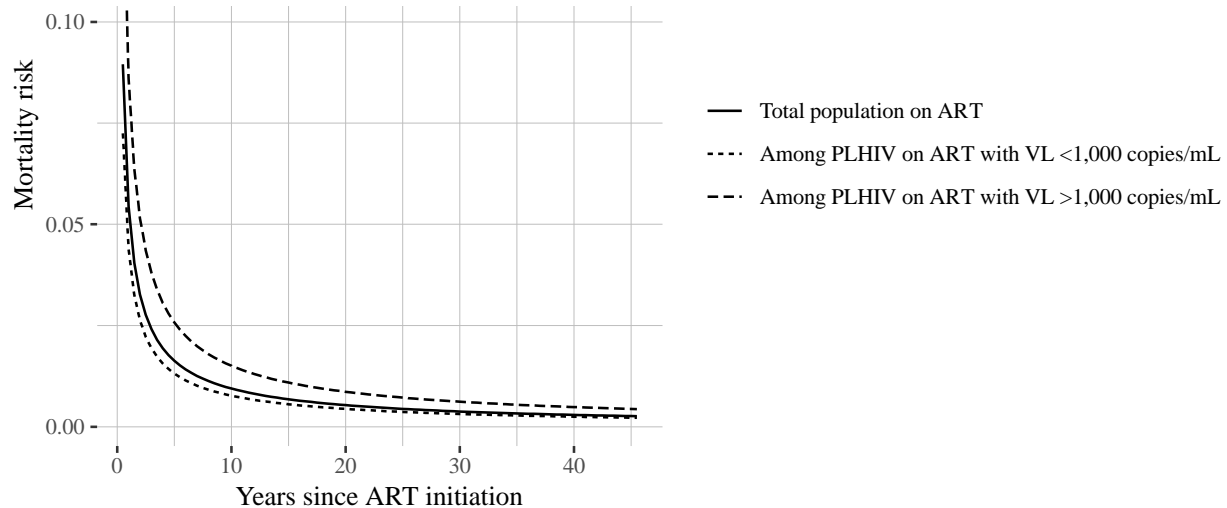

### Transmission risk by viral load among individuals on antiretroviral therapy

We assume that individuals on ART have a reduced risk of transmission, which depends on their VL (stratified as less than or greater than 1,000 viral copies/mL). Based on clinical data, we estimate that individuals on ART with VL <1,000 viral copies/mL experience a reduction in transmission risk of 96%.<sup>(17)</sup> There is a lack of empiric data on HIV transmission risk among persons on ART who are not virally suppressed (VL >1,000 viral copies/mL). Studies have estimated the relative risk of transmission per  $\log_{10}$  increase in viral load is 2.89 among individuals not on ART and 1.88 among individuals on ART (after controlling for relevant covariates).<sup>(17, 18)</sup> Therefore we assumed the relative reduction in HIV transmission for persons on ART with VL >1,000 viral copies/mL is  $1 - (1.88/2.89) = 35\%$ . However, to due the uncertainty of this parameter, we varied our assumption in sensitivity analyses from 0-70%.

**Table S4: HIV prevalence data by age and sex from population-based surveys for model calibration<sup>¥</sup>**

| Sex   | Age group | Year  |       |       |       |       |
|-------|-----------|-------|-------|-------|-------|-------|
|       |           | 2002  | 2005  | 2008  | 2012  | 2017  |
| Men   | 15-19     | 0.040 | 0.032 | 0.025 | 0.007 | 0.047 |
|       | 20-24     | 0.080 | 0.060 | 0.051 | 0.051 | 0.048 |
|       | 25-29     | 0.220 | 0.121 | 0.157 | 0.173 | 0.124 |
|       | 30-34     | 0.240 | 0.233 | 0.258 | 0.256 | 0.184 |
|       | 35-39     | 0.180 | 0.233 | 0.185 | 0.288 | 0.238 |
|       | 40-44     | 0.120 | 0.175 | 0.192 | 0.158 | 0.224 |
|       | 45-49     | 0.120 | 0.103 | 0.084 | 0.134 | 0.248 |
|       | 50-54     | 0.050 | 0.142 | 0.104 | 0.155 | 0.202 |
|       | 55-59     | 0.070 | 0.064 | 0.062 | 0.055 | 0.148 |
|       | 15-49     | 0.128 | 0.117 | 0.116 | 0.145 | 0.148 |
| Women | 15-19     | 0.070 | 0.094 | 0.067 | 0.056 | 0.058 |
|       | 20-24     | 0.170 | 0.239 | 0.211 | 0.174 | 0.156 |
|       | 25-29     | 0.320 | 0.333 | 0.327 | 0.284 | 0.275 |
|       | 30-34     | 0.240 | 0.260 | 0.291 | 0.360 | 0.347 |
|       | 35-39     | 0.140 | 0.193 | 0.248 | 0.316 | 0.394 |
|       | 40-44     | 0.190 | 0.124 | 0.163 | 0.280 | 0.359 |
|       | 45-49     | 0.110 | 0.087 | 0.141 | 0.197 | 0.303 |
|       | 50-54     | 0.080 | 0.075 | 0.102 | 0.148 | 0.222 |
|       | 55-59     | 0.070 | 0.030 | 0.077 | 0.097 | 0.176 |
|       | 15-49     | 0.177 | 0.202 | 0.213 | 0.232 | 0.263 |

<sup>¥</sup>Sources: South African National HIV Prevalence, Incidence and Behaviour Surveys (2002, 2005, 2008, 2012 and 2017) from the Human Sciences Research Council (HSRC)(19-22)

**Table S5: Number of people on ART by sex (ages 15-49 years) <sup>¥</sup>**

| Year | Male    | Female  |
|------|---------|---------|
| 2001 | 2713    | 3543    |
| 2002 | 5768    | 7586    |
| 2003 | 9321    | 12313   |
| 2004 | 17717   | 24423   |
| 2005 | 34874   | 59240   |
| 2006 | 66629   | 123308  |
| 2007 | 118977  | 228753  |
| 2008 | 186564  | 367389  |
| 2009 | 277931  | 548206  |
| 2010 | 402000  | 781477  |
| 2011 | 558131  | 1095411 |
| 2012 | 713294  | 1415016 |
| 2013 | 876749  | 1732515 |
| 2014 | 1013499 | 2003014 |
| 2015 | 1130063 | 2239669 |
| 2016 | 1238815 | 2518238 |
| 2017 | 1403702 | 2998170 |

<sup>¥</sup>Source: South Africa Department of Health Surveys(23)

**Table S6: HIV incidence by age and sex<sup>§</sup>**

| Year | Sex    | Age group | HIV incidence | 95% LB | 95% UB |
|------|--------|-----------|---------------|--------|--------|
| 2012 | Male   | 15 - 24   | 0.0055        | 0.0045 | 0.0065 |
| 2012 | Female | 15 - 24   | 0.0254        | 0.0204 | 0.0304 |
| 2012 | Male   | 15 - 49   | 0.0121        | 0.0097 | 0.0145 |
| 2012 | Female | 15 - 49   | 0.0228        | 0.0184 | 0.0274 |
| 2017 | Male   | 15 - 24   | 0.0049        | 0.0027 | 0.0071 |
| 2017 | Female | 15 - 24   | 0.0151        | 0.0131 | 0.0171 |
| 2017 | Male   | 15 - 49   | 0.0069        | 0.006  | 0.0076 |
| 2017 | Female | 15 - 49   | 0.0093        | 0.0071 | 0.0111 |

<sup>§</sup>Source: Human Sciences Research Council (HSRC) 2012 and 2018 Surveys(19, 20)

**Table S7: Population of South Africa by age and sex<sup>¥</sup>**

| Sex     | Age group | Year    |         |         |         |         |
|---------|-----------|---------|---------|---------|---------|---------|
|         |           | 2002    | 2005    | 2008    | 2012    | 2017    |
| Men     | 0 - 4     | 2634839 | 2651819 | 2692300 | 2784372 | 2886299 |
|         | 5 - 9     | 2559246 | 2570683 | 2592577 | 2644720 | 2767111 |
|         | 10 - 14   | 2582620 | 2565499 | 2557928 | 2578751 | 2636981 |
|         | 15 - 19   | 2546968 | 2596517 | 2584945 | 2572032 | 2587023 |
|         | 20 - 24   | 2348165 | 2488613 | 2572307 | 2606447 | 2594656 |
|         | 25 - 29   | 2069939 | 2215800 | 2362377 | 2530034 | 2612453 |
|         | 30 - 34   | 1759391 | 1899279 | 2018461 | 2227862 | 2488823 |
|         | 35 - 39   | 1488894 | 1568198 | 1664587 | 1845019 | 2131687 |
|         | 40 - 44   | 1270053 | 1324166 | 1367150 | 1493652 | 1731088 |
|         | 45 - 49   | 1077752 | 1122009 | 1159644 | 1234887 | 1398602 |
|         | 50 - 54   | 831061  | 925655  | 973184  | 1038560 | 1147992 |
| 55 - 59 | 636945    | 677128  | 760379  | 856728  | 947123  |         |
| Women   | 0 - 4     | 2587465 | 2602664 | 2640997 | 2729586 | 2825703 |
|         | 5 - 9     | 2523770 | 2535299 | 2555462 | 2604517 | 2719700 |
|         | 10 - 14   | 2557891 | 2533039 | 2526253 | 2545219 | 2603685 |
|         | 15 - 19   | 2527828 | 2568409 | 2552976 | 2535920 | 2555420 |
|         | 20 - 24   | 2323512 | 2451570 | 2523985 | 2560705 | 2550570 |
|         | 25 - 29   | 2064262 | 2167428 | 2282514 | 2447992 | 2550351 |
|         | 30 - 34   | 1807453 | 1906808 | 1967958 | 2123170 | 2394266 |
|         | 35 - 39   | 1577255 | 1648612 | 1717873 | 1821711 | 2039776 |
|         | 40 - 44   | 1370835 | 1434647 | 1491937 | 1594914 | 1745050 |
|         | 45 - 49   | 1184477 | 1243314 | 1302936 | 1396666 | 1541175 |
|         | 50 - 54   | 924873  | 1054059 | 1124243 | 1214556 | 1348848 |
| 55 - 59 | 727478    | 783876  | 898804  | 1035986 | 1160340 |         |

<sup>¥</sup>Source: United Nations Population Database(24)

**Table S8:** Number of voluntary medical male circumcisions conducted in South Africa by age group\*

| Year         | Age Group |         |         |         |         |       |
|--------------|-----------|---------|---------|---------|---------|-------|
|              | 10 - 14   | 15 - 19 | 20 - 24 | 25 - 34 | 35 - 49 | ≥50   |
| 2010         | 55,431    | 30,552  | 15,856  | 18,047  | 7,864   | 1,160 |
| 2011         | 137,648   | 75,866  | 39,374  | 44,816  | 19,527  | 2,881 |
| 2012         | 175,060   | 96,487  | 50,075  | 56,996  | 24,834  | 3,664 |
| 2013         | 156,496   | 86,255  | 44,765  | 50,952  | 22,201  | 3,276 |
| 2014         | 199,750   | 110,095 | 57,138  | 65,035  | 28,337  | 4,181 |
| 2015         | 199,535   | 109,976 | 57,076  | 64,965  | 28,306  | 4,176 |
| 2016         | 165,672   | 91,312  | 47,390  | 53,940  | 23,502  | 3,468 |
| 2017         | 203,960   | 112,415 | 58,342  | 66,406  | 28,934  | 4,269 |
| 2018         | 279,500   | 154,050 | 79,950  | 91,000  | 39,650  | 5,850 |
| 2019         | 258,000   | 142,200 | 73,800  | 84,000  | 36,600  | 5,400 |
| 2020         | 236,500   | 130,350 | 67,650  | 77,000  | 33,550  | 4,950 |
| 2021         | 215,000   | 118,500 | 61,500  | 70,000  | 30,500  | 4,500 |
| 2022 onwards | 43,000    | 23,700  | 12,300  | 14,000  | 6,100   | 900   |

\*Source: South Africa Department of Health (unpublished data) and South Africa National Strategic Plan for HIV, TB, and STIs 2017-2022(25)

**Figure S3: Calibration: Model fit to age-specific and overall prevalence from population-based surveys by sex.\***

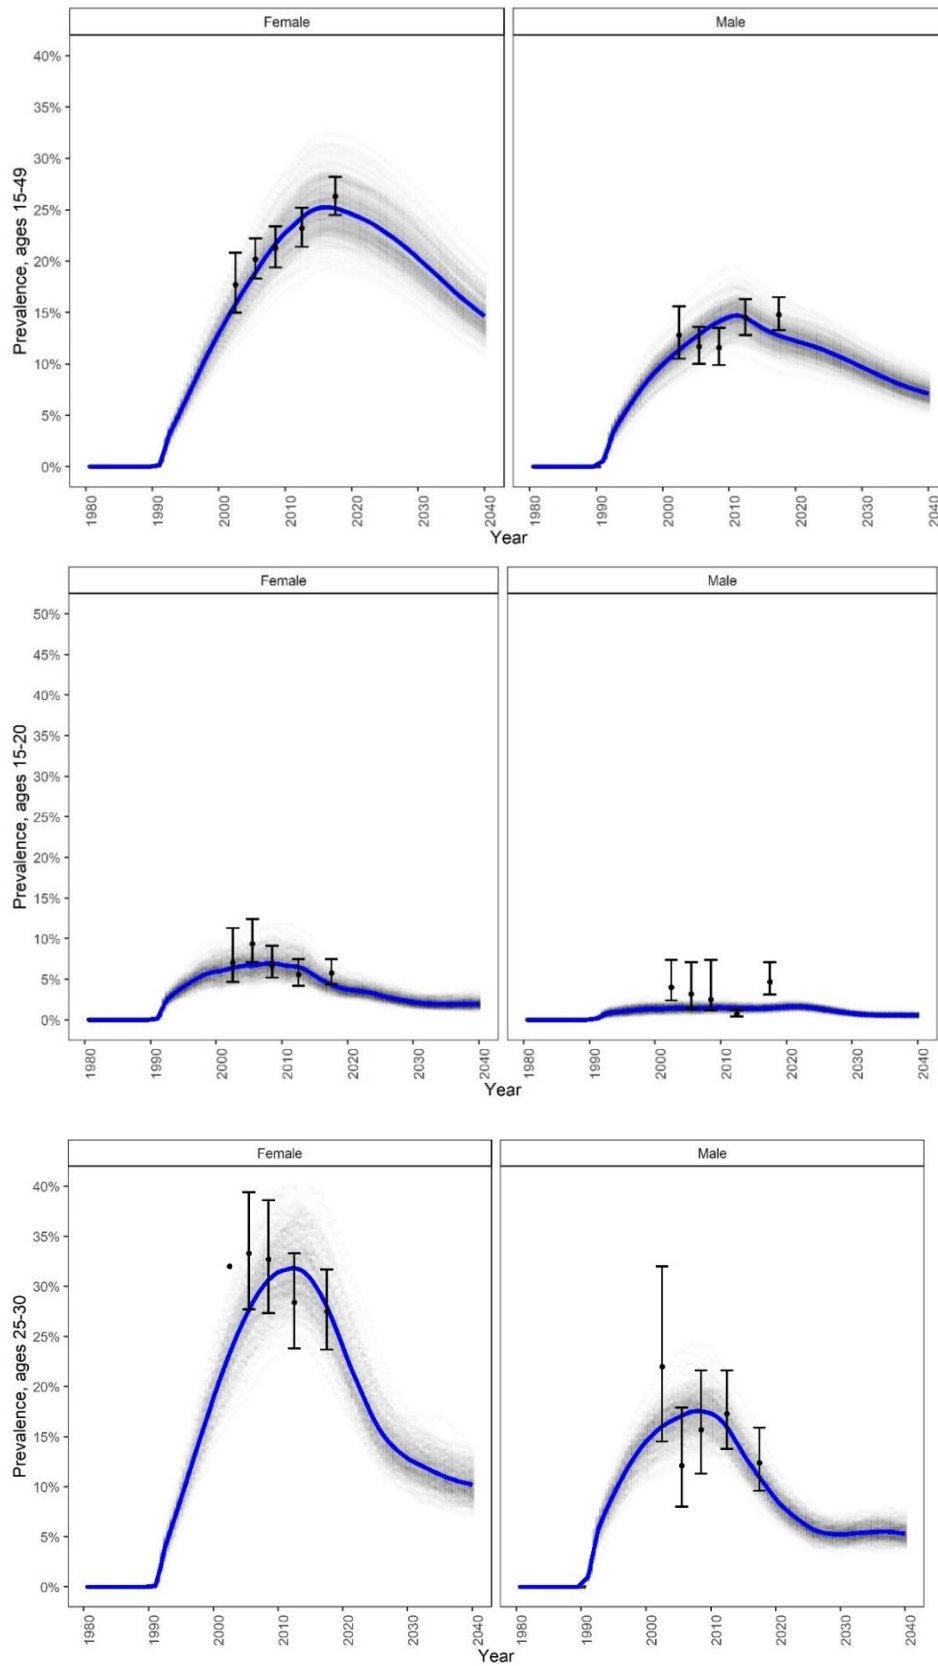

\* Points and error bars represent empiric data. 250 good-fitting parameter sets are shown in gray and loess average is shown in blue. Sources for HIV prevalence: South African National HIV Prevalence, Incidence and Behaviour Surveys (2002, 2005, 2008, 2012 and 2017) from the Human Sciences Research Council (HSRC)(19-22)



Figure S3 cont'd: Calibration: Model fit to age-specific and overall prevalence from population-based surveys by sex.\*

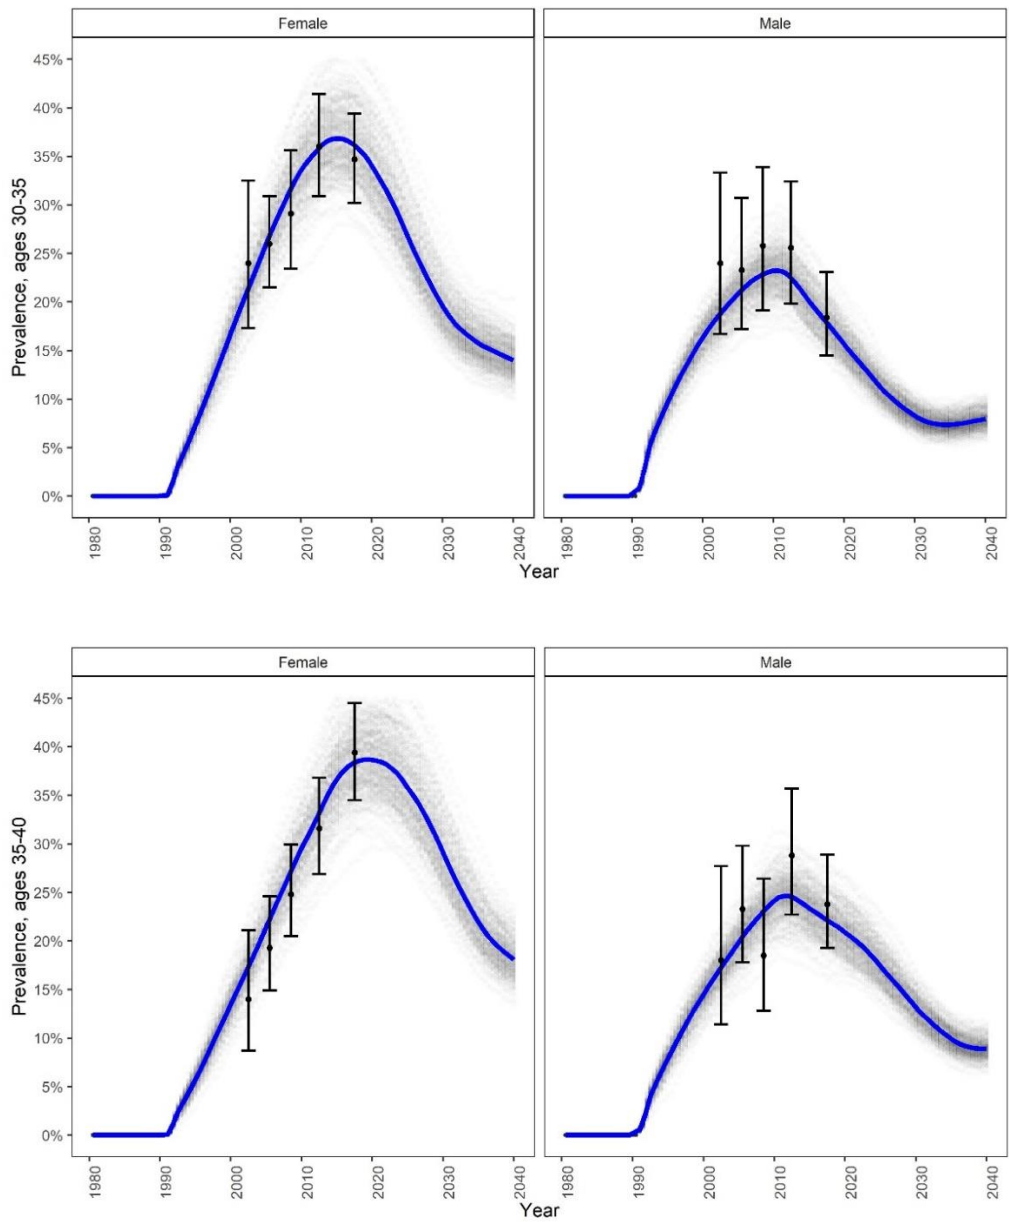

\* Points and error bars represent empiric data. 250 good-fitting parameter sets are shown in gray and loess average is shown in blue. Sources for HIV prevalence: South African National HIV Prevalence, Incidence and Behaviour Surveys (2002, 2005, 2008, 2012 and 2017) from the Human Sciences Research Council (HSRC) (19-22)

Figure S3 cont'd: Calibration: Model fit to age-specific and overall prevalence from population-based surveys by sex.\*

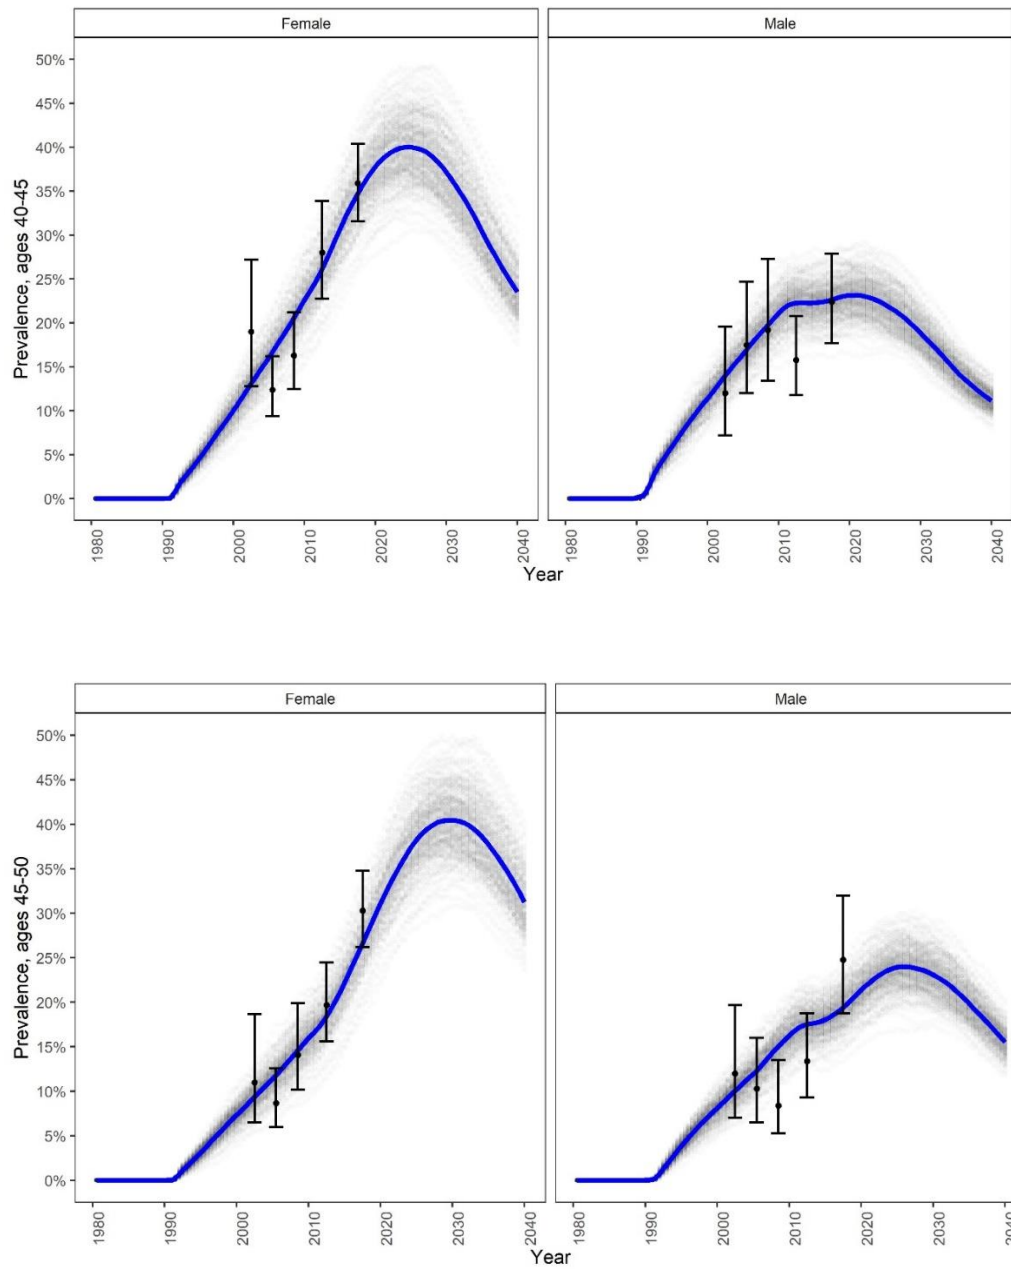

\* Points and error bars represent empiric data. 250 good-fitting parameter sets are shown in gray and loess average is shown in blue. Sources for HIV prevalence: South African National HIV Prevalence, Incidence and Behaviour Surveys (2002, 2005, 2008, 2012 and 2017) from the Human Sciences Research Council (HSRC) (19-22)

**Figure S4: Model fit to HIV incidence and number of person on ART by sex.\***

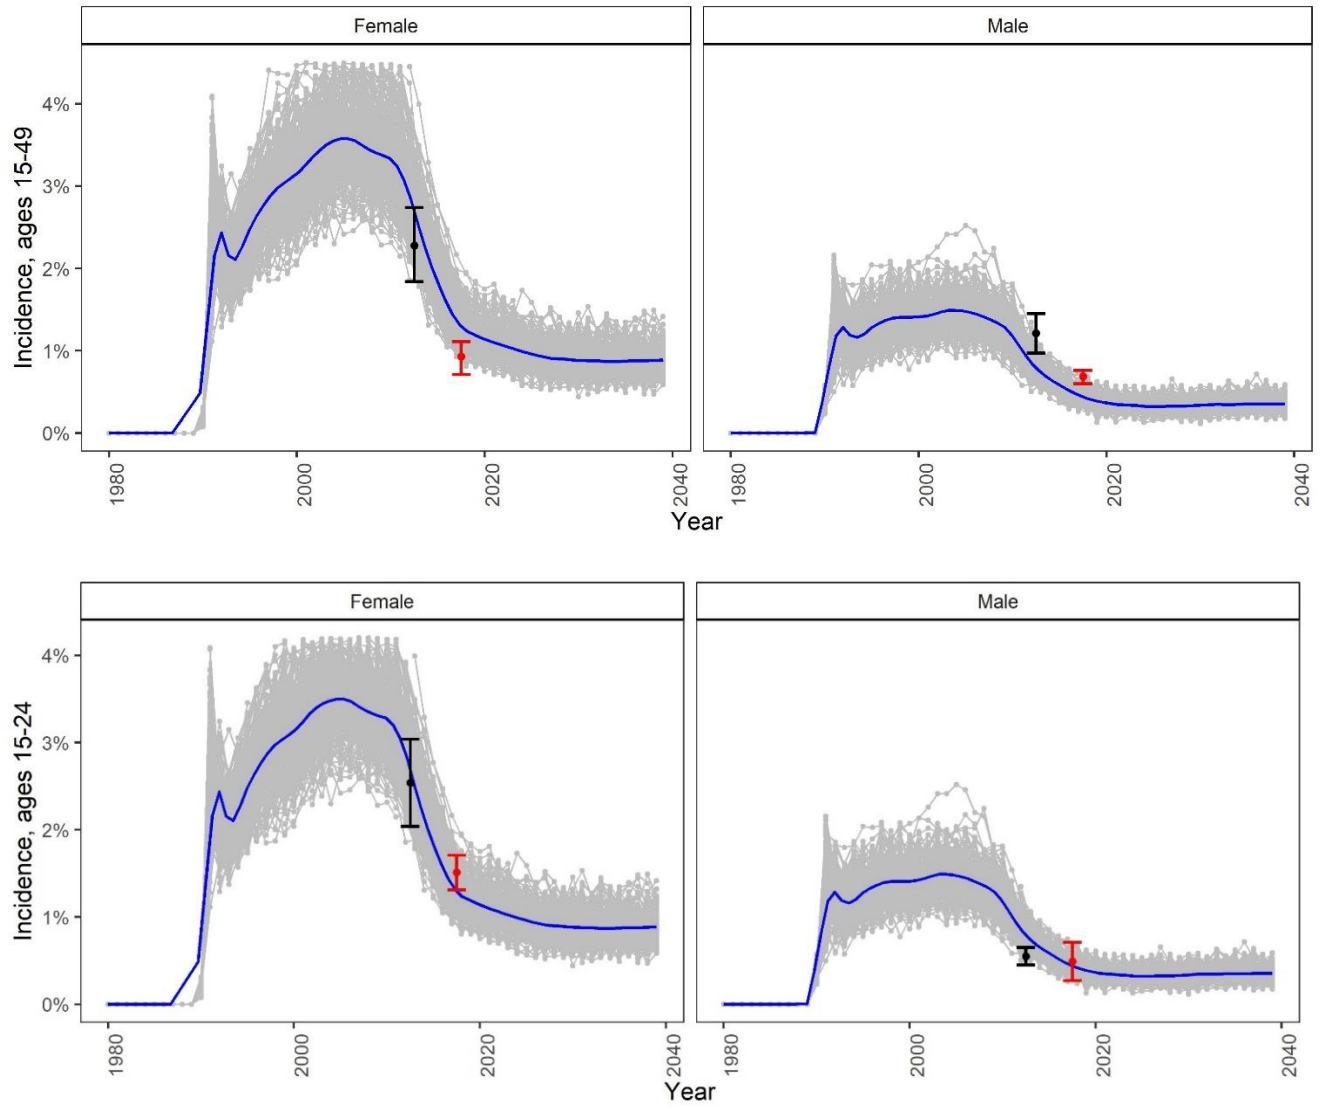

\* Points and error bars represent empiric data. 250 good-fitting parameter sets are shown in gray and loess average is shown in blue. Source for HIV incidence: Human Sciences Research Council (HSRC) 2012 and 2018 Surveys(19, 20)

**Figure S5: Model fit to number of person on ART by sex.\***

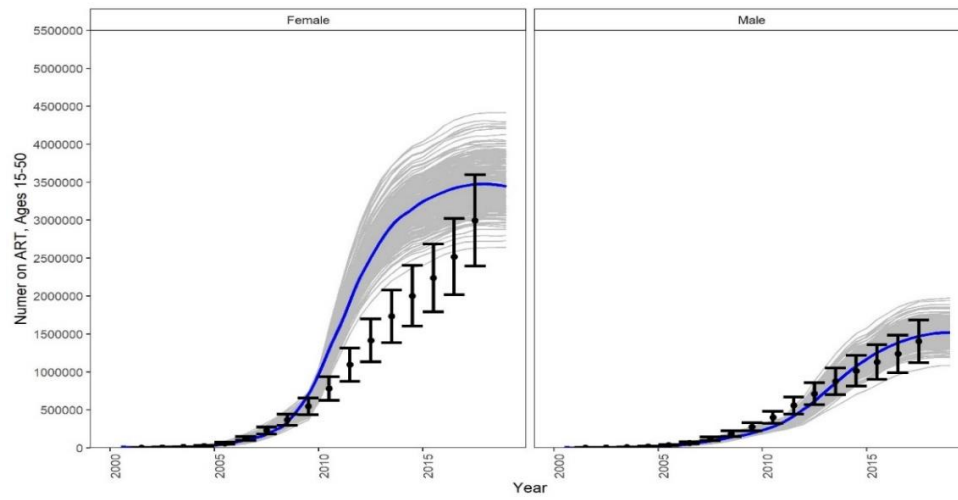

\* Points and error bars represent empiric data. 250 good-fitting parameter sets are shown in gray and loess average is shown in blue. Source for number of people on ART: South Africa Department of Health Surveys.(23)

**Table S9: Sensitivity analysis<sup>§</sup>**

|                                                 | Baseline           | No increase in referral to ART DSD | 20% higher referral to ART DSD | 2X higher switching to 2nd line ART in intervention | No increase in switching to 2nd line ART in intervention | 20% higher ART costs | 20% lower ART costs |
|-------------------------------------------------|--------------------|------------------------------------|--------------------------------|-----------------------------------------------------|----------------------------------------------------------|----------------------|---------------------|
| <b>Cost-effectiveness (\$ per DALY averted)</b> |                    |                                    |                                |                                                     |                                                          |                      |                     |
| Clinic volume: 50                               | -239 (-602, -96)   | 719 (90, 2,526)                    | -894 (-2768, -268)             | -15 (-95, 179)                                      | -449 (-1262, -149)                                       | -191 (-470, -81)     | -274 (-719, -102)   |
| % under \$500 threshold                         | 100%               | 72%                                | 100%                           | 97%                                                 | 100%                                                     | 100%                 | 100%                |
| Clinic volume: 40                               | -72 (-176, 26)     | 879 (125, 3,034)                   | -751 (-2277, -237)             | 145 (-38, 694)                                      | -289 (-765, -108)                                        | -30 (-123, 148)      | -113 (-257, -39)    |
| % under \$500 threshold                         | 100%               | 68%                                | 100%                           | 94%                                                 | 100%                                                     | 97%                  | 100%                |
| Clinic volume: 30                               | 197 (-27, 863)     | 1,149 (184, 3,886)                 | -511 (-1458, -177)             | 415 (23, 1,559)                                     | -21 (-102, 160)                                          | 238 (-25, 1,011)     | 156 (-30, 719)      |
| % under \$500 threshold                         | 93%                | 56%                                | 100%                           | 84%                                                 | 97%                                                      | 91%                  | 93%                 |
| Clinic volume: 20                               | 734 (93, 2,569)    | 1,686 (296, 5,585)                 | -32 (-110, 122)                | 951 (140, 3,255)                                    | 517 (48, 1,879)                                          | 775 (96, 2,721)      | 692 (90, 2,413)     |
| % under \$500 threshold                         | 72%                | 36%                                | 97%                            | 64%                                                 | 80%                                                      | 71%                  | 73%                 |
| Clinic volume: 10                               | 2,348 (436, 7,681) | 3,300 (635, 10,733)                | 1,404 (276, 5,069)             | 2,564 (481, 8,375)                                  | 2130 (389, 6,984)                                        | 2,389 (439, 7,828)   | 2,306 (432, 7,530)  |
| % under \$500 threshold                         | 9%                 | 11%                                | 34%                            | 8%                                                  | 21%                                                      | 16%                  | 18%                 |

<sup>§</sup>Values in parenthesis represent 90% model variability across 250 simulations. Values in green represent scenarios where the mean ICER is considered cost-effective at both thresholds of \$500 and \$1,175 per DALY averted. Values in yellow represent scenarios where the mean ICER is considered cost-effective using only the threshold of \$1,175 per DALY averted and values in red exceed both thresholds.

**Table S10: Sensitivity analysis cont'd<sup>§</sup>**

|                                                 | Baseline           | 0% discount rate  | 6% discount rate | 60% POC testing coverage | 80% POC testing coverage | Probabilistic sensitivity analysis |
|-------------------------------------------------|--------------------|-------------------|------------------|--------------------------|--------------------------|------------------------------------|
| <b>Cost-effectiveness (\$ per DALY averted)</b> |                    |                   |                  |                          |                          |                                    |
| Clinic volume: 50                               | -239 (-602, -96)   | -192 (-457, -93)  | -250 (-659, -96) | -165 (-591, -46)         | -239 (-502, -67)         | -339 (-1919, 1376)                 |
| % under \$500 threshold                         | 100%               | 100%              | 100%             | 99%                      | 99%                      | 88%                                |
| Clinic volume: 40                               | -72 (-176, 26)     | -80 (-169, -9)    | -60 (-169, 32)   | 71 (-321, 24)            | -110 (-229, 1)           | -64 (-1334, 1616)                  |
| % under \$500 threshold                         | 100%               | 100%              | 100%             | 99%                      | 100%                     | 80%                                |
| Clinic volume: 30                               | 197 (-27, 863)     | 102 (-35, 470)    | 246 (-19, 1002)  | 461 (-159, 415)          | 107 (-125, 397)          | 152 (-1150, 2259)                  |
| % under \$500 threshold                         | 93%                | 90%               | 91%              | 88%                      | 97%                      | 72%                                |
| Clinic volume: 20                               | 734 (93, 2,569)    | 663 (74, 1766)    | 858 (122, 3102)  | 1,005 (163, 3,660)       | 537 (42, 1,423)          | 942 (-494, 3300)                   |
| % under \$500 threshold                         | 72%                | 78%               | 64%              | 60%                      | 81%                      | 58%                                |
| Clinic volume: 10                               | 2,348 (436, 7,681) | 2,050 (377, 5240) | 2695 (502, 9408) | 3,096 (502, 5020)        | 1,832 (372, 4,509)       | 1,879 (211, 8066)                  |
| % under \$500 threshold                         | 9%                 | 10%               | 5%               | 6%                       | 30%                      | 23%                                |

<sup>§</sup>Values in parenthesis represent 90% model variability across 250 simulations. Values in green represent scenarios where the mean ICER is considered cost-effective at both thresholds of \$500 and \$1,175 per DALY averted. Values in yellow represent scenarios where the mean ICER is considered cost-effective using only the threshold of \$1,175 per DALY averted and values in red exceed both thresholds. In the probabilistic sensitivity analysis, point-of-care testing costs were varied across the 250 parameter sets using a log normal distribution with a mean of the log of average costs.

**Table S11: 5-year budget impact analysis (2018 USD)<sup>¥</sup>**

| <b>Cost category</b>                   | <b>Standard of care</b> | <b>Clinic volume 50</b> | <b>Clinic volume 40</b> | <b>Clinic volume 30</b> | <b>Clinic volume 20</b> | <b>Clinic volume 10</b> |
|----------------------------------------|-------------------------|-------------------------|-------------------------|-------------------------|-------------------------|-------------------------|
| ART monitoring                         | 6,664,494               | 7,471,136               | 7,692,736               | 8,062,032               | 8,802,224               | 11,025,557              |
| ART drugs and provision                | 31,075,279              | 30,107,263              | 30,107,263              | 30,107,263              | 30,107,263              | 30,107,263              |
| HIV testing                            | 1,093,583               | 1,093,451               | 1,093,451               | 1,093,451               | 1,093,451               | 1,093,451               |
| Health-care use for HIV+ not in care   | 1,548,242               | 1,547,030               | 1,547,030               | 1,547,030               | 1,547,030               | 1,547,030               |
| End of life care                       | 209,894                 | 204,547                 | 204,547                 | 204,547                 | 204,547                 | 204,547                 |
| <b>Total</b>                           | <b>40,591,492</b>       | <b>40,423,428</b>       | <b>40,645,027</b>       | <b>41,014,323</b>       | <b>41,754,515</b>       | <b>43,977,849</b>       |
| <b>Cost difference compared to SOC</b> | <b>-</b>                | <b>(168,064)</b>        | <b>53,535</b>           | <b>422,831</b>          | <b>1,163,023</b>        | <b>3,386,356</b>        |

\*SOC: Standard of care

Figure S6: 20-year budget impact analysis: Incremental costs by year of POC intervention and standard of care

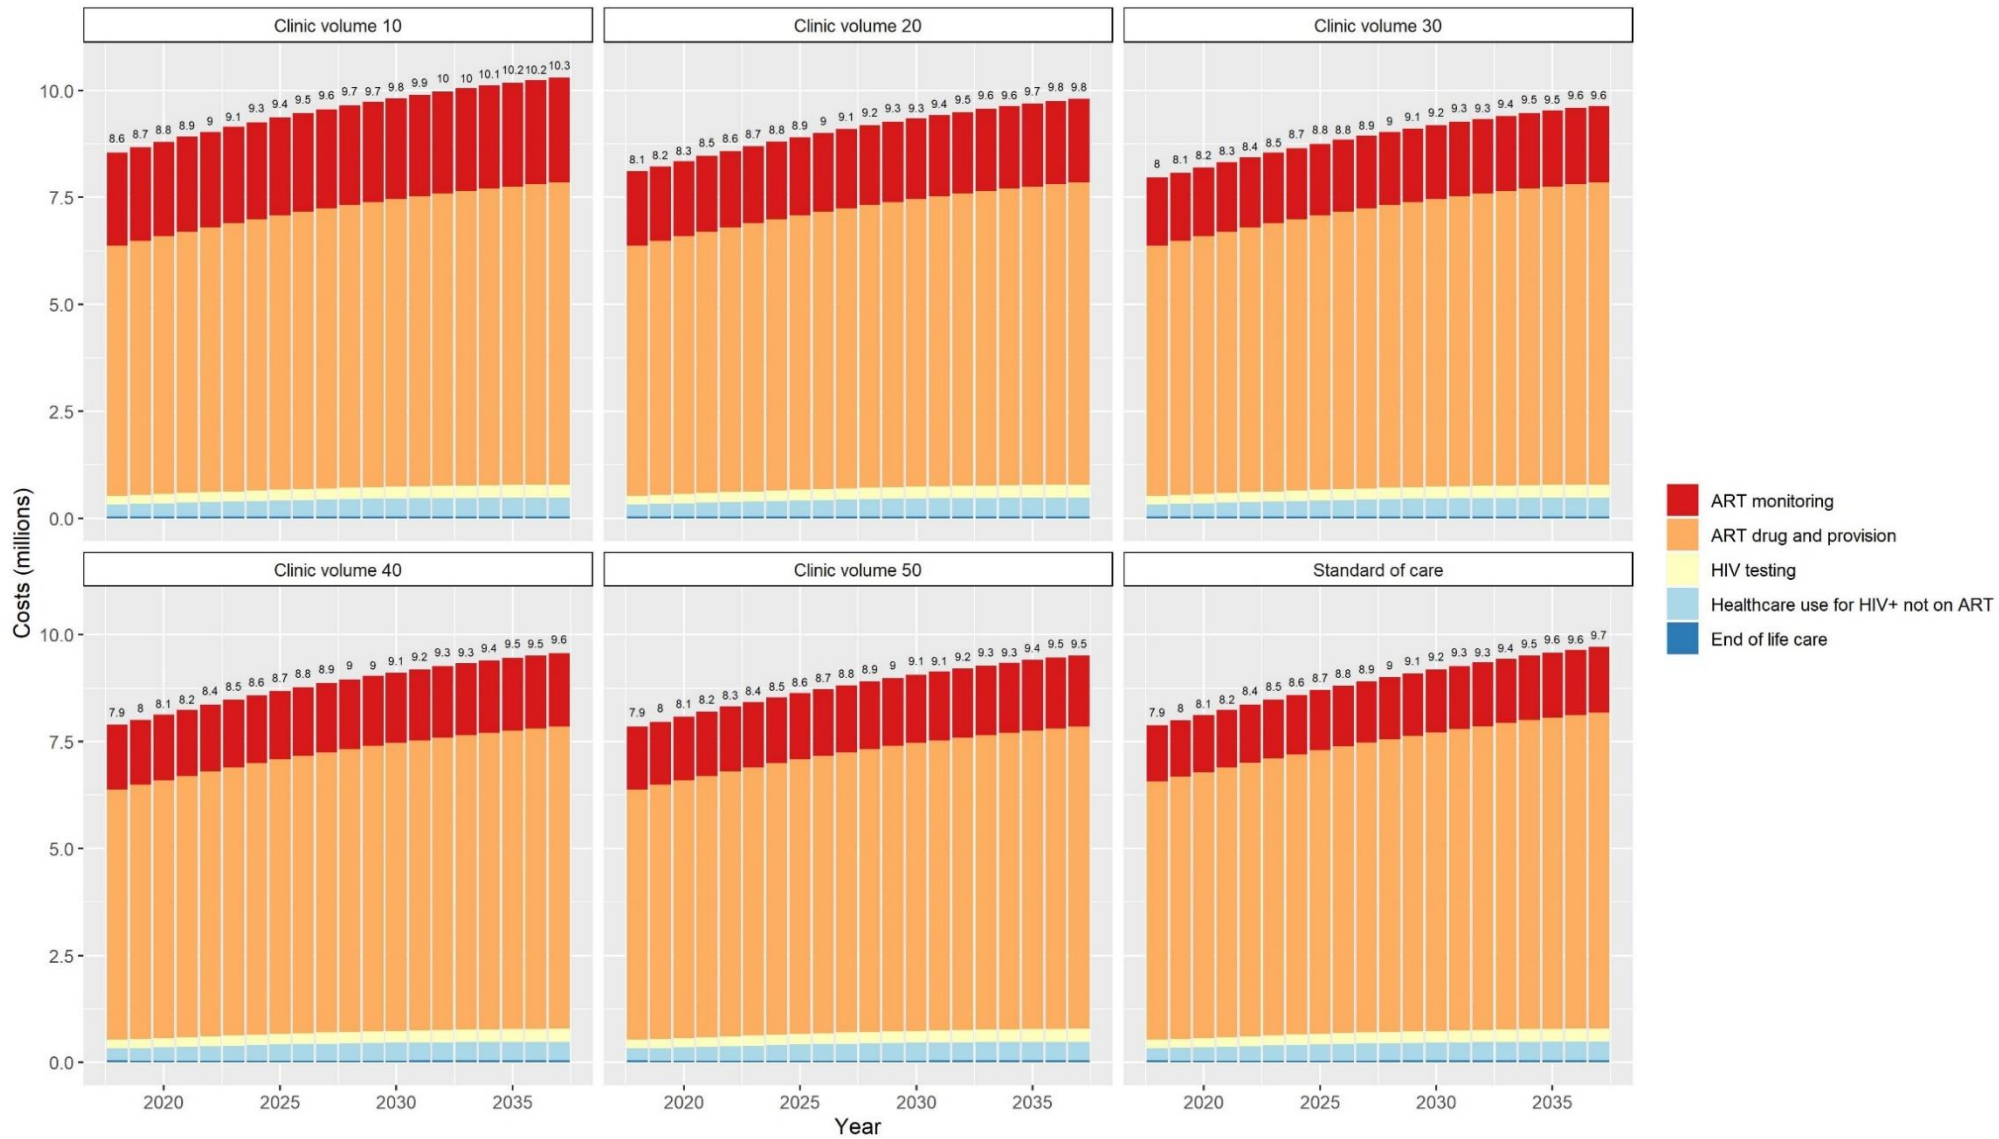



**Figure S7: 20-year cost pressure analysis of intervention incremental costs compared to standard-of-care**

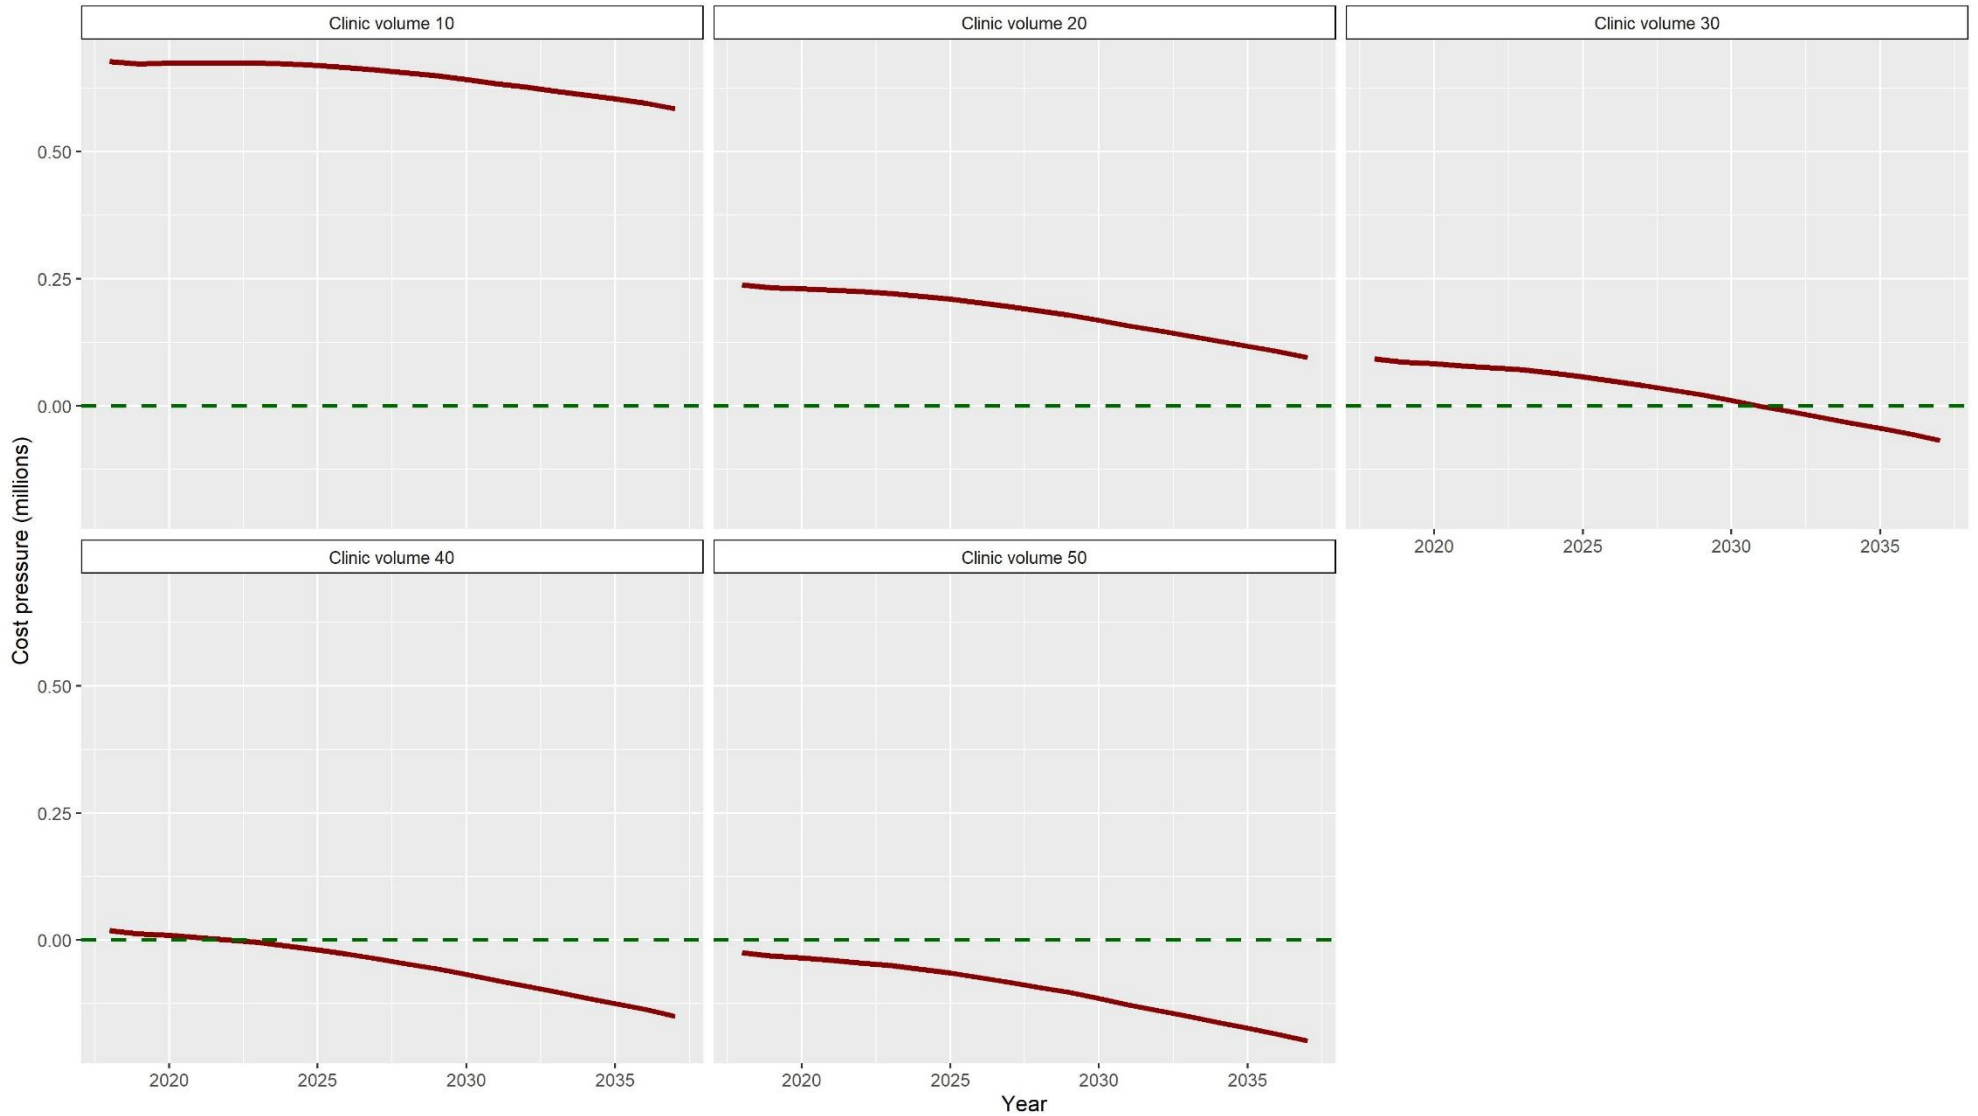

\*Dashed green line indicates cost of intervention is the same as standard of care

## Assessment of clinic volume of facilities in South Africa

In order to estimate the proportion of persons living with HIV (PLHIV) in South Africa who can be cost-effectively reached by the POC testing intervention, we assessed clinic volume of healthcare facilities by quantile (Table S12) using data from the World Bank and District Health Information Software (DHIS). Overall, approximately 2 million of the 2.95 million PLHIV on ART (68%) receive care at the top 25% largest volume facilities. Assuming that the number of new ART initiations per month is 16-25% of the total volume of ART patients at the facilities, we would estimate that the monthly ART initiations for the largest volume facilities is between 31-37 PLHIV. Our modeling analysis suggests that POC testing would be cost-effective in clinics with 20-30 ART initiations per month; therefore we estimate that approximately 70% of PLHIV in South Africa can be cost-effectively served by the intervention; however this proportion will likely decline over time as South Africa achieves epidemic control and the number of patients on ART decline across facilities.

**Table S12: Clinic volume by quantile in South Africa<sup>‡</sup>**

| Clinic size  | Number of facilities DHIS | total number of PLHIV on ART (DHIS) | Percentage of total PLHIV served by facility size quantile | Mean number of PLHIV on ART in each facility | Mean number of ART initiations per month (assuming 25% of patients are new initiations) | Mean number of ART initiations per month (assuming 16% of patients are new initiations) |
|--------------|---------------------------|-------------------------------------|------------------------------------------------------------|----------------------------------------------|-----------------------------------------------------------------------------------------|-----------------------------------------------------------------------------------------|
| 1st quartile | 919                       | 2,020,925                           | 68%                                                        | 2,199                                        | 37                                                                                      | 31                                                                                      |
| 2nd quartile | 918                       | 579,486                             | 20%                                                        | 631                                          | 11                                                                                      | 9                                                                                       |
| 3rd quartile | 918                       | 262,049                             | 9%                                                         | 285                                          | 5                                                                                       | 4                                                                                       |
| 4th quartile | 919                       | 88,699                              | 3%                                                         | 97                                           | 2                                                                                       | 1                                                                                       |
| <b>Total</b> | <b>3674</b>               | <b>2,951,159</b>                    | <b>100%</b>                                                | <b>803</b>                                   | <b>13</b>                                                                               | <b>11</b>                                                                               |

<sup>‡</sup>Data source: World Bank(26). DHIS: District Health Information Software.

## References

1. Hollingsworth TD, Anderson RM, Fraser C. HIV-1 transmission, by stage of infection. *The Journal of infectious diseases*. 2008;198(5):687-93.
2. Wawer MJ, Gray RH, Sewankambo NK, Serwadda D, Li X, Laeyendecker O, et al. Rates of HIV-1 Transmission per Coital Act, by Stage of HIV-1 Infection, in Rakai, Uganda. *The Journal of infectious diseases*. 2005;191(9):1403-9.
3. Auvert B, Taljaard D, Lagarde E, Sobngwi-Tambekou J, Sitta R, Puren A. Randomized, controlled intervention trial of male circumcision for reduction of HIV infection risk: the ANRS 1265 Trial. *PLoS medicine*. 2005;2(11):e298.
4. Bailey RC, Moses S, Parker CB, Agot K, Maclean I, Krieger JN, et al. Male circumcision for HIV prevention in young men in Kisumu, Kenya: a randomised controlled trial. *Lancet*. 2007;369(9562):643-56.
5. Gray RH, Kigozi G, Serwadda D, Makumbi F, Watya S, Nalugoda F, et al. Male circumcision for HIV prevention in men in Rakai, Uganda: a randomised trial. *Lancet*. 2007;369(9562):657-66.
6. Bershteyn A, Gerardin J, Bridenbecker D, Lorton CW, Bloedow J, Baker RS, et al. Implementation and applications of EMOD, an individual-based multi-disease modeling platform. *Pathog Dis*. 2018.
7. F Venter, The Dolutegravir Dilemma: South African perspective. Accessed from: <https://sahivsoc.org/FileUpload/20181022%20at%2011h50%20Venter.pdf> on July 31, 2019.
8. Wilkinson L, Harley B, Sharp J, Solomon S, Jacobs S, Cragg C, et al. Expansion of the Adherence Club model for stable antiretroviral therapy patients in the Cape Metro, South Africa 2011-2015. *Tropical medicine & international health : TM & IH*. 2016;21(6):743-9.
9. Simeon K, Sharma M, Dorward J, Naidoo J, Dlamini N, Moodley P, et al. Comparative cost analysis of point-of-care versus laboratory-based testing to initiate and monitor HIV treatment in South Africa. *PLoS one*. 2019;14(10):e0223669.
10. World Health Organization Statistical Information System: CHOICE (Choosing Interventions that are Cost Effective). Last accessed 2 February 2019 from: <https://www.who.int/choice/cost-effectiveness/en/> [
11. Munjanja O, Kibuka S, Dovlo D. *The nursing workforce in sub-Saharan Africa*. Geneva, Switzerland: International Council of Nurses, 2005.
12. WHO Africa Health Workforce Observatory. Definitions of the 23 health workforce categories. Available at: [http://apps.who.int/globalatlas/docs/HRH\\_HWO/HTML/Dftn.htm](http://apps.who.int/globalatlas/docs/HRH_HWO/HTML/Dftn.htm). (accessed 4 Aug 2020).
13. Bershteyn A, Klein DJ, Wenger E, Eckhoff PA. Description of the EMOD-HIV Model v0.7. 2012;arXiv:1206.3720.
14. National AIDS & STI Control Programme (NASCOP) Ministry of Health. Kenya AIDS Indicator Survey 2012: Final Report. Nairobi, Kenya: NASCOP; 2014.
15. Johnson LF, Kubjane M, Moola H. MicroCOSM: a model of social and structural drivers of HIV and interventions to reduce HIV incidence in high-risk populations in South Africa. *bioRxiv*.310763.
16. Lee JS, Cole SR, Richardson DB, Dittmer DP, Miller WC, Moore RD, et al. Incomplete viral suppression and mortality in HIV patients after antiretroviral therapy initiation. *AIDS (London, England)*. 2017;31(14):1989-97.
17. Cohen MS, Chen YQ, McCauley M, Gamble T, Hosseinipour MC, Kumarasamy N, et al. Prevention of HIV-1 infection with early antiretroviral therapy. *N Engl J Med*. 2011;365(6):493-505.
18. Hughes JP, Baeten JM, Lingappa JR, Magaret AS, Wald A, de Bruyn G, et al. Determinants of per-coital-act HIV-1 infectivity among African HIV-1-serodiscordant couples. *The Journal of infectious diseases*. 2012;205(3):358-65.
19. South African National HIV Prevalence, Incidence, Behaviour and Communication Survey, 2017. Accessed from: [http://www.hsrc.ac.za/en/departments/saph/HAST\\_National\\_HIV\\_Survey](http://www.hsrc.ac.za/en/departments/saph/HAST_National_HIV_Survey) on 3/8/2020.
20. South African National HIV Prevalence, Incidence and Behaviour Survey, 2012. Accessed from: <http://www.hsrc.ac.za/en/research-outputs/view/6871> on 3/1/2020.
21. South African National HIV Prevalence, HIV Incidence, Behaviour and Communication Survey, 2005. Accessed from: <https://www.hsrcpress.ac.za/books/south-african-national-hiv-prevalence-hiv-incidence-behaviour-and-communication-survey-2005> on 2/26/2020.
22. South African national HIV prevalence, incidence, behaviour and communication survey, 2008. Accessed from: <http://www.hsrc.ac.za/en/research-outputs/view/4505> on 2/26/2020.

23. South Africa Demographic and Health Survey 2016. Accessed from: [http://www.statssa.gov.za/?page\\_id=6634](http://www.statssa.gov.za/?page_id=6634) on 3/4/2020.
24. United Nations Population Database. Accessed from: <https://population.un.org/wpp/> on 3/5/2020.
25. Let our actions count: South Africa's national strategic plan for HIV, TB and STIs 2017-2022. Accessed on 3/13/2020 from: [https://sanac.org.za/wp-content/uploads/2017/06/NSP\\_FullDocument\\_FINAL.pdf](https://sanac.org.za/wp-content/uploads/2017/06/NSP_FullDocument_FINAL.pdf).
26. World Bank. Analysis of Big Data for Better Targeting of ART Adherence Strategies Spatial Clustering Analysis of Viral Load Suppression by South African Province, District, Sub-District and Facility. Accessed on 8/4/2020 from: <https://elibrary.worldbank.org/doi/pdf/10.1596/25399>
